# Supplementary material for: Nonlinear d10-ML2 Transition-Metal Complexes
Source: PubMed Central journal article supplement (PMC3703815; doi:10.1002/open.201300009), 2013-05-06
Supplement: open0002-0106-SD1.pdf [file open0002-0106-SD1.pdf]

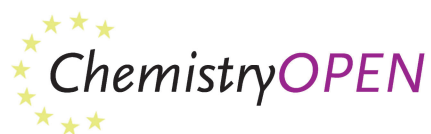

## Supporting Information

© 2013 The Authors. Published by Wiley-VCH Verlag GmbH & Co. KGaA, Weinheim

### **Nonlinear $d^{10}$ - $ML_2$ Transition-Metal Complexes**

Lando P. Wolters<sup>[a]</sup> and F. Matthias Bickelhaupt<sup>\*[a, b]</sup>

open\_201300009\_sm\_miscellaneous\_information.pdf

## Content

**Figure S1.** Molecular orbital diagram for the intermixing of  $d_{x^2-y^2}$  and  $d_{z^2}$  with ligand orbitals.

**Table S1.** Cartesian coordinates and ADF total bonding energies of all species in this studies, computed at ZORA-BLYP/TZ2P.

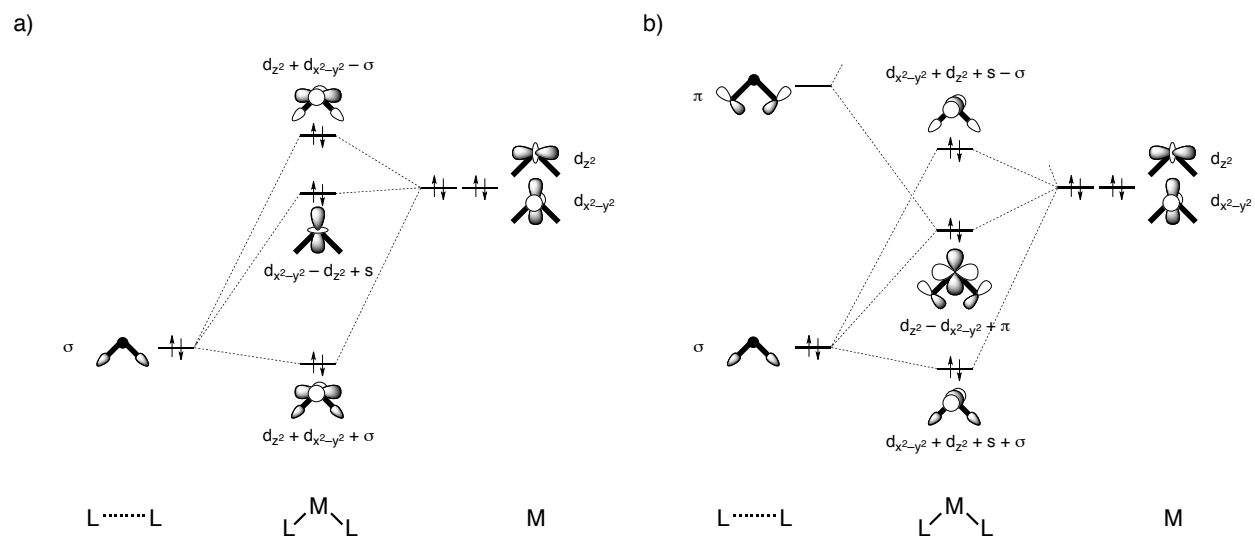

**Figure S1.** Molecular orbital diagram for the mixing of ligand orbitals with the metal  $d_{x^2-y^2}$  and  $d_{z^2}$  orbitals, without (a) and with  $\pi$ -backbonding (b). The lowest-energy molecular orbital that results from these interactions is not shown in the Walsh diagrams in Figure 8 of the main text.



|                                                                   |             |             |                                        |             |             |                                                |             |             |
|-------------------------------------------------------------------|-------------|-------------|----------------------------------------|-------------|-------------|------------------------------------------------|-------------|-------------|
| Rh(CO) <sub>2</sub> <sup>-</sup>                                  |             | [-847.94]   | Pd(CO) <sub>2</sub>                    |             | [-747.40]   | Ag(CO) <sub>2</sub> <sup>+</sup>               |             | [-542.73]   |
| Rh 0.00000000                                                     | 0.00000000  | 0.00000000  | Pd 0.00000000                          | 0.00000000  | 0.00000000  | Ag 0.00000000                                  | 0.00000000  | 0.00000000  |
| C -1.69616138                                                     | 0.00000000  | 0.77677342  | C 0.00000000                           | -1.90528693 | -0.41228329 | C 0.00000000                                   | 0.00000000  | 2.11270784  |
| O -2.59107157                                                     | 0.00000000  | 1.55525490  | O 0.00000000                           | -2.99823353 | -0.76339230 | O 0.00000000                                   | 0.00000000  | 3.23894702  |
| C 1.69616138                                                      | 0.00000000  | 0.77677342  | C 0.00000000                           | 1.90528693  | -0.41228329 | C 0.00000000                                   | 0.00000000  | -2.11270784 |
| O 2.59107157                                                      | 0.00000000  | 1.55525490  | O 0.00000000                           | 2.99823353  | -0.76339230 | O 0.00000000                                   | 0.00000000  | -3.23894702 |
| IrNH <sub>2</sub> <sup>-</sup>                                    |             | [-502.46]   | PtNH <sub>2</sub>                      |             | [-482.26]   | AuNH <sub>2</sub> <sup>+</sup>                 |             | [-287.41]   |
| Ir 0.00000000                                                     | 0.00000000  | 0.00000000  | Pt 0.00000000                          | 0.00000000  | 0.00000000  | Au 0.00000000                                  | 0.00000000  | 0.00000000  |
| N 0.00000000                                                      | 0.00000000  | 1.96729882  | N 0.00000000                           | 0.00000000  | 1.98078444  | N 0.00000000                                   | 0.00000000  | 2.08495377  |
| H -0.97665900                                                     | 0.00000000  | 2.33397792  | H -0.96779494                          | 0.00000000  | 2.32263285  | H -0.96477816                                  | 0.00000000  | 2.43335078  |
| H 0.48832950                                                      | -0.84581150 | 2.33397792  | H 0.48839747                           | -0.83813500 | 2.32263285  | H 0.48238908                                   | -0.83552240 | 2.43335078  |
| H 0.48832950                                                      | 0.84581150  | 2.33397792  | H 0.48839747                           | 0.83813500  | 2.32263285  | H 0.48238908                                   | 0.83552240  | 2.43335078  |
| IrPH <sub>2</sub> <sup>-</sup>                                    |             | [-454.17]   | PtPH <sub>2</sub>                      |             | [-419.61]   | AuPH <sub>2</sub> <sup>+</sup>                 |             | [-210.40]   |
| Ir 0.00000000                                                     | 0.00000000  | 0.00000000  | Pt 0.00000000                          | 0.00000000  | 0.00000000  | Au 0.00000000                                  | 0.00000000  | 0.00000000  |
| P 0.00000000                                                      | 0.00000000  | 2.05647914  | P 0.00000000                           | 0.00000000  | 2.09525493  | P 0.00000000                                   | 0.00000000  | 2.23958510  |
| H 0.62000459                                                      | -1.07387946 | 2.81727128  | H -1.24947482                          | 0.00000000  | 2.77273058  | H -1.29520069                                  | 0.00000000  | 2.79520516  |
| H -1.24000919                                                     | 0.00000000  | 2.81727128  | H 0.62473741                           | -1.08207694 | 2.77273058  | H 0.64760035                                   | -1.12167670 | 2.79520516  |
| H 0.62000459                                                      | 1.07387946  | 2.81727128  | H 0.62473741                           | 1.08207694  | 2.77273058  | H 0.64760035                                   | 1.12167670  | 2.79520516  |
| IrCO <sup>-</sup>                                                 |             | [-482.43]   | PtCO                                   |             | [-418.78]   | AuCO <sup>+</sup>                              |             | [-169.73]   |
| Ir 0.00000000                                                     | 0.00000000  | 0.00000000  | Pt 0.00000000                          | 0.00000000  | 0.00000000  | Au 0.00000000                                  | 0.00000000  | 0.00000000  |
| C 0.00000000                                                      | 0.00000000  | 1.73360818  | C 0.00000000                           | 0.00000000  | 1.77640737  | C 0.00000000                                   | 0.00000000  | 1.92662084  |
| O 0.00000000                                                      | 0.00000000  | 2.93745671  | O 0.00000000                           | 0.00000000  | 2.93799331  | O 0.00000000                                   | 0.00000000  | 3.05607061  |
| Ir(NH <sub>3</sub> ) <sub>2</sub> <sup>-</sup>                    |             | [-960.03]   | Pt(NH <sub>3</sub> ) <sub>2</sub>      |             | [-957.89]   | Au(NH <sub>3</sub> ) <sub>2</sub> <sup>+</sup> |             | [-786.05]   |
| Ir 0.00000000                                                     | 0.00000000  | 0.00000000  | Pt 0.00000000                          | 0.00000000  | 0.00000000  | Au 0.00000000                                  | 0.00000000  | 0.00000000  |
| N 0.00000000                                                      | 0.00000000  | 2.07058451  | N 0.00000000                           | 0.00000000  | 2.06082030  | N 0.00000000                                   | 0.00000000  | 2.08804100  |
| H -0.96629572                                                     | 0.00000000  | 2.44321743  | H 0.47946523                           | -0.83045814 | 2.42208863  | H -0.95533348                                  | 0.00000000  | 2.45867078  |
| H 0.48314786                                                      | -0.83683664 | 2.44321743  | H 0.47946523                           | 0.83045814  | 2.42208863  | H 0.47766674                                   | -0.82734306 | 2.45867078  |
| H 0.48314786                                                      | 0.83683664  | 2.44321743  | H -0.95893046                          | 0.00000000  | 2.42208863  | H 0.47766674                                   | 0.82734306  | 2.45867078  |
| N 0.00000000                                                      | 0.00000000  | -2.07058451 | N 0.00000000                           | 0.00000000  | -2.06082030 | N 0.00000000                                   | 0.00000000  | -2.08804100 |
| H -0.96629572                                                     | 0.00000000  | -2.44321743 | H 0.47946523                           | -0.83045814 | -2.42208863 | H -0.95533348                                  | 0.00000000  | -2.45867078 |
| H 0.48314786                                                      | -0.83683664 | -2.44321743 | H -0.95893046                          | 0.00000000  | -2.42208863 | H 0.47766674                                   | -0.82734306 | -2.45867078 |
| H 0.48314786                                                      | 0.83683664  | -2.44321743 | H 0.47946523                           | 0.83045814  | -2.42208863 | H 0.47766674                                   | 0.82734306  | -2.45867078 |
| Ir(PH <sub>2</sub> ) <sub>2</sub> <sup>-</sup>                    |             | [-842.44]   | Pt(PH <sub>2</sub> ) <sub>2</sub>      |             | [-802.43]   | Au(PH <sub>2</sub> ) <sub>2</sub> <sup>+</sup> |             | [-607.15]   |
| Ir 0.00000000                                                     | 0.00000000  | 0.69592050  | Pt 0.00000000                          | 0.00000000  | 0.00000000  | Au 0.00000000                                  | 0.00000000  | 0.00000000  |
| P 0.00000000                                                      | 2.08321807  | 1.36978823  | P 0.00000000                           | 0.00000000  | 2.24913921  | P 0.00000000                                   | 0.00000000  | 2.35097967  |
| H 0.00000000                                                      | 3.37212829  | 0.65703177  | H 0.61537140                           | -1.06585453 | 2.96140633  | H -0.63323787                                  | 1.09680017  | 2.97378831  |
| H -1.06646209                                                     | 2.52986440  | 2.23124490  | H 0.61537140                           | 1.06585453  | 2.96140633  | H -0.63323787                                  | -1.09680017 | 2.97378831  |
| H 1.06646209                                                      | 2.52986440  | 2.23124490  | H -1.23074280                          | 0.00000000  | 2.96140633  | H 1.26647574                                   | 0.00000000  | 2.97378831  |
| P 0.00000000                                                      | -2.08321807 | 1.36978823  | P 0.00000000                           | 0.00000000  | -2.24913921 | P 0.00000000                                   | 0.00000000  | -2.35097967 |
| H 0.00000000                                                      | -3.37212829 | 0.65703177  | H 0.61537140                           | -1.06585453 | -2.96140633 | H -0.63323787                                  | 1.09680017  | -2.97378831 |
| H 1.06646209                                                      | -2.52986440 | 2.23124490  | H -1.23074280                          | 0.00000000  | -2.96140633 | H 1.26647574                                   | 0.00000000  | -2.97378831 |
| H -1.06646209                                                     | -2.52986440 | 2.23124490  | H 0.61537140                           | 1.06585453  | -2.96140633 | H -0.63323787                                  | -1.09680017 | -2.97378831 |
| Ir(CO) <sub>2</sub> <sup>-</sup>                                  |             | [-881.34]   | Pt(CO) <sub>2</sub>                    |             | [-798.54]   | Au(CO) <sub>2</sub> <sup>+</sup>               |             | [-552.55]   |
| Ir 0.00000000                                                     | 0.00000000  | 0.00000000  | Pt 0.00000000                          | 0.00000000  | -0.87440400 | Au 0.00000000                                  | 0.00000000  | 0.00000000  |
| C -1.70750444                                                     | 0.00000000  | 0.72174648  | C 0.00000000                           | -1.87943075 | -0.52609898 | C 0.00000000                                   | 0.00000000  | 2.00241463  |
| O -2.63203751                                                     | 0.00000000  | 1.47280574  | O 0.00000000                           | -2.97450638 | -0.17383272 | O 0.00000000                                   | 0.00000000  | 3.12982845  |
| C 1.70750444                                                      | 0.00000000  | 0.72174648  | C 0.00000000                           | 1.87943075  | -0.52609898 | C 0.00000000                                   | 0.00000000  | -2.00241463 |
| O 2.63203751                                                      | 0.00000000  | 1.47280574  | O 0.00000000                           | 2.97450638  | -0.17383272 | O 0.00000000                                   | 0.00000000  | -3.12982845 |
| Co(PH <sub>2</sub> ) <sub>2</sub> <sup>-</sup> [D <sub>3h</sub> ] |             | [-804.95]   | Ni(CO) <sub>2</sub> [D <sub>3h</sub> ] |             | [-781.02]   |                                                |             |             |
| Co 0.00000000                                                     | 0.00000000  | 0.00000000  | Ni 0.00000000                          | 0.00000000  | 0.00000000  |                                                |             |             |
| P 0.00000000                                                      | 0.00000000  | 2.08536773  | C 0.00000000                           | 0.00000000  | 1.78186588  |                                                |             |             |
| H 1.05421861                                                      | -0.60865340 | 2.88604139  | O 0.00000000                           | 0.00000000  | 2.93437773  |                                                |             |             |
| H 0.00000000                                                      | 1.21730680  | 2.88604139  | C 0.00000000                           | 0.00000000  | -1.78186588 |                                                |             |             |
| H -1.05421861                                                     | -0.60865340 | 2.88604139  | O 0.00000000                           | 0.00000000  | -2.93437773 |                                                |             |             |
| P 0.00000000                                                      | 0.00000000  | -2.08536773 |                                        |             |             |                                                |             |             |
| H -1.05421861                                                     | 0.60865340  | -2.88604139 |                                        |             |             |                                                |             |             |
| H 1.05421861                                                      | -0.60865340 | -2.88604139 |                                        |             |             |                                                |             |             |
| H 0.00000000                                                      | -1.21730680 | -2.88604139 |                                        |             |             |                                                |             |             |
| Co(CO) <sub>2</sub> <sup>-</sup> [D <sub>3h</sub> ]               |             | [-836.52]   | Pd(CO) <sub>2</sub> [D <sub>3h</sub> ] |             | [-746.91]   |                                                |             |             |
| Co 0.00000000                                                     | 0.00000000  | 0.00000000  | Pd 0.00000000                          | 0.00000000  | 0.00000000  |                                                |             |             |
| C 0.00000000                                                      | 0.00000000  | 1.76467991  | C 0.00000000                           | 0.00000000  | 1.95675205  |                                                |             |             |
| O 0.00000000                                                      | 0.00000000  | 2.95000321  | O 0.00000000                           | 0.00000000  | 3.10249810  |                                                |             |             |
| C 0.00000000                                                      | 0.00000000  | -1.76467991 | C 0.00000000                           | 0.00000000  | -1.95675205 |                                                |             |             |
| O 0.00000000                                                      | 0.00000000  | -2.95000321 | O 0.00000000                           | 0.00000000  | -3.10249810 |                                                |             |             |
| Rh(PH <sub>2</sub> ) <sub>2</sub> <sup>-</sup> [D <sub>3h</sub> ] |             | [-816.96]   | Pt(CO) <sub>2</sub> [D <sub>3h</sub> ] |             | [-797.94]   |                                                |             |             |
| Rh 0.00000000                                                     | 0.00000000  | 0.00000000  | Pt 0.00000000                          | 0.00000000  | 0.00000000  |                                                |             |             |
| P 0.00000000                                                      | 0.00000000  | -2.21815534 | C 0.00000000                           | 0.00000000  | 1.91991082  |                                                |             |             |
| H 0.60072639                                                      | -1.04048863 | -3.02309974 | O 0.00000000                           | 0.00000000  | 3.06774725  |                                                |             |             |
| H -1.20145278                                                     | 0.00000000  | -3.02309974 | C 0.00000000                           | 0.00000000  | -1.91991082 |                                                |             |             |
| H 0.60072639                                                      | 1.04048863  | -3.02309974 | O 0.00000000                           | 0.00000000  | -3.06774725 |                                                |             |             |
| P 0.00000000                                                      | 0.00000000  | 2.21815534  |                                        |             |             |                                                |             |             |
| H 0.60072639                                                      | -1.04048863 | 3.02309974  |                                        |             |             |                                                |             |             |
| H 0.60072639                                                      | 1.04048863  | 3.02309974  |                                        |             |             |                                                |             |             |
| H -1.20145278                                                     | 0.00000000  | 3.02309974  |                                        |             |             |                                                |             |             |
| Rh(CO) <sub>2</sub> <sup>-</sup> [D <sub>3h</sub> ]               |             | [-837.77]   |                                        |             |             |                                                |             |             |
| Rh 0.00000000                                                     | 0.00000000  | 0.00000000  |                                        |             |             |                                                |             |             |
| C 0.00000000                                                      | 0.00000000  | 1.90928797  |                                        |             |             |                                                |             |             |
| O 0.00000000                                                      | 0.00000000  | 3.08218877  |                                        |             |             |                                                |             |             |
| C 0.00000000                                                      | 0.00000000  | -1.90928797 |                                        |             |             |                                                |             |             |
| O 0.00000000                                                      | 0.00000000  | -3.08218877 |                                        |             |             |                                                |             |             |
| Ir(PH <sub>2</sub> ) <sub>2</sub> <sup>-</sup> [D <sub>3h</sub> ] |             | [-840.07]   |                                        |             |             |                                                |             |             |
| Ir 0.00000000                                                     | 0.00000000  | 0.00000000  |                                        |             |             |                                                |             |             |
| P 0.00000000                                                      | 0.00000000  | 2.21076208  |                                        |             |             |                                                |             |             |
| H -0.60828651                                                     | 1.05358313  | 2.99131941  |                                        |             |             |                                                |             |             |
| H -0.60828651                                                     | -1.05358313 | 2.99131941  |                                        |             |             |                                                |             |             |
| H 1.21657301                                                      | 0.00000000  | 2.99131941  |                                        |             |             |                                                |             |             |
| P 0.00000000                                                      | 0.00000000  | -2.21076208 |                                        |             |             |                                                |             |             |
| H -0.60828651                                                     | 1.05358313  | -2.99131941 |                                        |             |             |                                                |             |             |
| H 1.21657301                                                      | 0.00000000  | -2.99131941 |                                        |             |             |                                                |             |             |
| H -0.60828651                                                     | -1.05358313 | -2.99131941 |                                        |             |             |                                                |             |             |
| Ir(CO) <sub>2</sub> <sup>-</sup> [D <sub>3h</sub> ]               |             | [-867.95]   |                                        |             |             |                                                |             |             |
| Ir 0.00000000                                                     | 0.00000000  | 0.00000000  |                                        |             |             |                                                |             |             |
| C 0.00000000                                                      | 0.00000000  | 1.90083961  |                                        |             |             |                                                |             |             |
| O 0.00000000                                                      | 0.00000000  | 3.07682715  |                                        |             |             |                                                |             |             |
| C 0.00000000                                                      | 0.00000000  | -1.90083961 |                                        |             |             |                                                |             |             |
| O 0.00000000                                                      | 0.00000000  | -3.07682715 |                                        |             |             |                                                |             |             |
